# Supplementary material
Source: publisher figshare collection journal article supplement (https://frontiersin.figshare.com/ndownloader/files/14119979)
Supplement: Supplementary file 1 [file 14119979]

|  | | | *Order amphipoda* | | | | | | | | *Order isopoda* | | *Class gastropoda* | *Order decapoda* | |
| --- | --- | --- | --- | --- | --- | --- | --- | --- | --- | --- | --- | --- | --- | --- | --- |
| Month | Habitat | Site | *Ampithoe longimana* | *Ampithoe valida* | *Caprella penantis* | *Cymodusa compta* | *Dulichiella sp.* | *Elasmopus levis* | *Gammarus mucronatus* | *Paracaprella tenuis* | *Erichsonella attenuata* | *Idotea tribola* | *Bittium sp.* | *Hippolyte sp.* | *Palaemonetes sp.* | |
| June | *Ruppia* | G | 0 | 0.3±0.3 | 228±39.7 | 17.7±10.7 | 0 | 0 | 28.3±2.3 | 0 | 5.3±2.6 | 0 | 0 | 0 | 0 | |
| M | 0.7±0.7 | 0 | 0 | 18.7±8.7 | 0 | 1.7±1.2 | 46.7±21.9 | 0 | 9±2.6 | 0 | 58±23.6 | 0 | 0 | |
| P | 1.3±0.7 | 0 | 71.7±35.4 | 5.7±5.7 | 0 | 1±1 | 12.3±8.9 | 0.7±0.7 | 6.7±5.2 | 0 | 3.7±2.7 | 0 | 0 | |
| *Zostera* | G | 0 | 0 | 43±15.3 | 13.3±2.6 | 0 | 0.3±0.3 | 24.3±5.9 | 0 | 22.3±4.7 | 0 | 2.3±1.3 | 0 | 0 | |
| M | 0 | 0 | 0.3±0.3 | 19±5.5 | 0 | 22±6.5 | 39±6.4 | 0 | 19±9.5 | 0.3±0.3 | 128±41.8 | 0 | 0 | |
| P | 1.7±0.9 | 0 | 89.7±44.9 | 0.3±0.3 | 0 | 0.3±0.3 | 1±0.6 | 40.3±38.8 | 5.3±1.8 | 0 | 1.3±0.9 | 0 | 0 | |
| August | *Ruppia* | G | 0 | 0 | 2±1 | 0 | 0 | 0.3±0.3 | 0 | 0 | 70.7±17.6 | 0 | 0 | 0 | 0.7±0.3 | |
| M | 0 | 0 | 0 | 3±1.7 | 0 | 0 | 0 | 0 | 11.3±5.2 | 0 | 1.7±0.9 | 0.3±0.3 | 0.3±0.3 | |
| P | 0 | 0 | 1±0.6 | 0 | 0 | 1.3±0.9 | 0 | 0.3±0.3 | 7±4.4 | 0 | 0.7±0.3 | 0 | 0 | |
| *Zostera* | G | 0 | 0 | 1±1 | 1±0.6 | 1.3±1.3 | 4±2.3 | 0 | 0 | 30±2.5 | 0 | 0 | 0 | 0 | |
| M | 0 | 0.7±0.7 | 0 | 8±4.7 | 0 | 0 | 0.3±0.3 | 0 | 14±8.1 | 0 | 0.3±0.3 | 0 | 1±0 | |
| P | 0 | 0 | 1±0.6 | 0.3±0.3 | 0 | 0.3±0.3 | 0.3±0.3 | 0 | 3±1.5 | 0 | 0.7±0.7 | 0 | 0.3±0.3 | |
